2. Marlu R, Hodaj E, Paris A, Albaladejo P, Cracowski JL, Crackowski JL, Pernod G: Effect of non-specific reversal agents on anticoagulant activity of dabigatran and rivaroxaban: A randomised crossover *ex vivo* study in healthy volunteers. *Thromb Haemost* 2012; 108:217–24
3. Leissinger C, Gringeri A, Antmen B, Berntorp E, Biasoli C, Carpenter S, Cortesi P, Jo H, Kavakli K, Lassila R, Morfini M, Négrier C, Rocino A, Schramm W, Serban M, Uscatescu MV, Windyga J, Zulfikar B, Mantovani L: Anti-inhibitor coagulant complex prophylaxis in hemophilia with inhibitors. *N Engl J Med* 2011; 365:1684–92
4. Hay CR, Brown S, Collins PW, Keeling DM, Liesner R: The diagnosis and management of factor VIII and IX inhibitors: A guideline from the United Kingdom Haemophilia Centre Doctors Organisation. *Br J Haematol* 2006; 133:591–605
5. Dager WE, Gosselin RC, Roberts AJ: Reversing dabigatran in life-threatening bleeding occurring during cardiac ablation with factor eight inhibitor bypassing activity. *Crit Care Med* 2013; 41:e42–6
6. Siegal DM, Crowther MA: Acute management of bleeding in patients on novel oral anticoagulants. *Eur Heart J* 2013; 34:489–98

(Accepted for publication September 16, 2013.)

#### In Reply:

I appreciate your comments; however, the review did not deliberately ignore the potential of Factor VIII Inhibitor Bypassing Activity (FEIBA; Baxter AG, Deerfield, IL) as you suggest, and FEIBA is mentioned but details were not provided. However, if you check table 2, there is further discussion on the use of activated prothrombin complex concentrates.<sup>1</sup> The table legend specifically states that in patients receiving dabigatran, the use of an activated prothrombin complex concentrate such as FEIBA may be more effective, and there are no studies reporting the use of prothrombin complex concentrates on actual bleeding in patients. Further studies including the development of specific reversal agents are underway currently.<sup>1</sup> Of note is the study by Marlu *et al.*<sup>2</sup> that you describe is an *in vitro* study, and caution should be considered for extrapolating *in vitro* data to clinical application. You also reference a case report. Please note that case reports are interesting, but an *n* = 1 or 2 is not a case series. The authors also suggest that FEIBA appears not to be approved by the Food and Drug Administration, but this is not the case. Although using an activated prothrombin complex concentrate such as FEIBA appears to make sense, additional human data are needed before we can make definitive conclusions.

The studies described in more detail in the review article on prothrombin complex concentrates were actually performed in volunteers receiving therapeutic doses of the new oral anticoagulation agents including rivaroxaban and dabigatran.<sup>3</sup> I am also a part of additional studies further

investigating the role of prothrombin complex concentrates for reversal of rivaroxaban in volunteers.\* Of note is a specific reversal agent has also been developed for dabigatran, using an immunospecific Fab fragment (BI 655075).<sup>4</sup> This novel therapeutic approach is entering into clinical trials.†

Clinicians when faced with life-threatening hemorrhage do indeed need to know all of the information and data available to manage these complex and critically ill patients.<sup>5</sup> Further clinical studies are needed to best determine the optimal therapy for bleeding when it occurs in patients related to the novel oral anticoagulation agents.

#### Competing Interests

Dr. Levy has served or serves on research steering committees or advisory boards for CSL Behring, King of Prussia, Pennsylvania; Boehringer-Ingelheim, Ingelheim, Germany; Grifols, Research Triangle Park, North Carolina; and Janssen Research & Development, Raritan, New Jersey.

**Jerrold H. Levy, M.D., F.A.H.A., F.C.C.M.,** Duke University School of Medicine, Durham, North Carolina. jerrold.levy@duke.edu

#### References

1. Levy JH, Faraoni D, Spring JL, Douketis JD, Samama CM: Managing new oral anticoagulants in the perioperative and intensive care unit setting. *ANESTHESIOLOGY* 2013; 118:1466–74
2. Marlu R, Hodaj E, Paris A, Albaladejo P, Cracowski JL, Crackowski JL, Pernod G: Effect of non-specific reversal agents on anticoagulant activity of dabigatran and rivaroxaban: A randomised crossover *ex vivo* study in healthy volunteers. *Thromb Haemost* 2012; 108:217–24
3. Eerenberg ES, Kamphuisen PW, Sijpkens MK, Meijers JC, Buller HR, Levi M: Reversal of rivaroxaban and dabigatran by prothrombin complex concentrate: A randomized, placebo-controlled, crossover study in healthy subjects. *Circulation* 2011; 124:1573–9
4. Schiele F, van Ryn J, Canada K, Newsome C, Sepulveda E, Park J, Nar H, Litzemberger T: A specific antidote for dabigatran: Functional and structural characterization. *Blood* 2013; 121:3554–62
5. Karkouti K, Levy JH: Commentary: Recombinant activated factor VII: The controversial conundrum regarding its off-label use. *Anesth Analg* 2011; 113:711–2

(Accepted for publication September 16, 2013.)

## Acute Kidney Injury, Surgery, and Angiotensin Axis Blockade

#### To the Editor:

We read with interest the Case Scenario: Hemodynamic Management of Postoperative Acute Kidney Injury.<sup>1</sup> The authors present a 59-yr-old patient with the only preoperative medication an angiotensin-converting enzyme inhibitor for hypertension, who suffers acute kidney injury

\* Available at: <http://clinicaltrials.gov/ct2/show/NCT01656330>. Accessed October 9, 2013.

† Available at: <http://clinicaltrials.gov/ct2/show/NCT01688830?term=BI655075&rank=1>. Accessed October 9, 2013.
